# Supplementary material for: Intrauterine L-NAME Exposure Weakens the Development of Sympathetic Innervation and Induces the Remodeling of Arterial Vessels in Two-Week-Old Rats
Source: MDPI journal article supplement (doi:10.3390/ijms222212327), 2021-11-15
Supplement: s1 [file s1]

## SUPPLEMENTARY MATERIALS

### Intrauterine L-NAME Treatment Weakens the Development of Sympathetic Innervation and Induces Remodeling of Arterial Vessels in Two-Week Old Rats

Ekaterina K. Selivanova<sup>1,†</sup>, Anastasia A. Shvetsova<sup>1,†</sup>, Anna A. Borzykh<sup>2</sup>, Dina K. Gaynullina<sup>1</sup>, Oxana O. Kiryukhina<sup>3</sup>, Elena V. Lukoshkova<sup>4</sup>, Viktoria M. Potekhina<sup>1</sup>, Vladislav S. Kuzmin<sup>1</sup>, Olga S. Tarasova<sup>1,2,\*</sup>

<sup>1</sup> Department of Human and Animal Physiology, Faculty of Biology, M.V. Lomonosov Moscow State University, 119234 Moscow, Russia; selivanova@mail.bio.msu.ru (E.K.S.); anastasiashvetsova92@gmail.com (A.A.S.); dina.gaynullina@gmail.com (D.K.G.); ku290381@mail.ru (V.S.K.); vm-potekhina@yandex.ru (V.M.P.)

<sup>2</sup> Laboratory of Exercise Physiology, State Research Center of the Russian Federation-Institute for Biomedical Problems, Russian Academy of Sciences, 123007 Moscow, Russia; borzykh.anna@gmail.com

<sup>3</sup> Laboratory for the Study of Information Processes at the Cellular and Molecular Levels, Institute for Information Transmission Problems, Russian Academy of Sciences, 119333 Moscow, Russia; kcyu@yandex.ru

<sup>4</sup> Laboratory of Experimental Pathology of the Heart, National Medical Research Center of Cardiology, Ministry of Health of the Russian Federation, 121552, Moscow, Russia

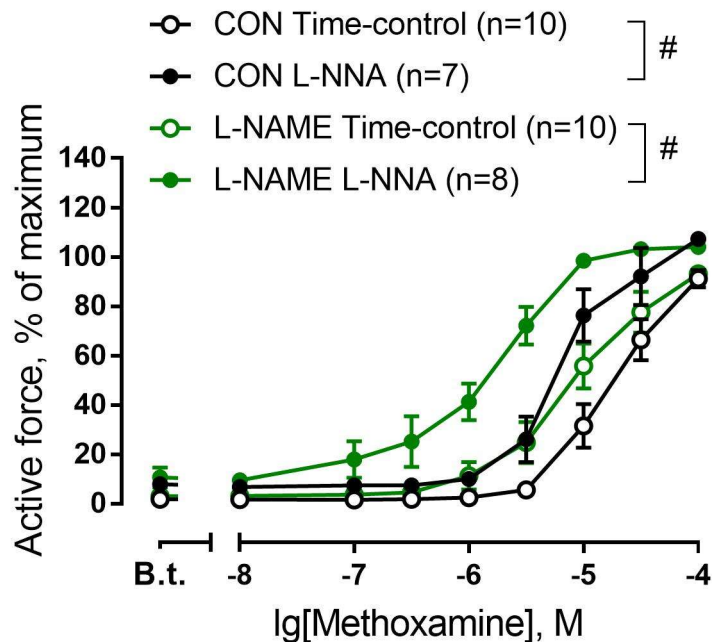

**Figure S1.** NO-synthase inhibitor did not remove the difference in saphenous artery contractile responses to methoxamine between pups from control (CON) and L-NAME offspring. Concentration-response relationships to  $\alpha_1$ -adrenoceptor agonist methoxamine in the presence of solvent ( $H_2O$ , 50  $\mu L$  per 5 mL myograph chamber, Time-control) or NO-synthase inhibitor L-NNA (100  $\mu M$ ) of saphenous arteries from control and L-NAME offspring, n – number of animals. B.t.—basal tone value (active force before the first concentration of methoxamine). Data are presented as mean and S.E.M. # $p < 0.05$  (Repeated Measures ANOVA).
